# Supplementary material for: Identification of new signalling peptides through a genome-wide survey of 250 fungal secretomes
Source: BMC Genomics. 2019 Jan 18;20:64. doi: 10.1186/s12864-018-5414-2 (PMC6339444; doi:10.1186/s12864-018-5414-2)
Supplement: Supplementary file 1 — Table S1. Overall description of the species identified in the pipeline. (XLSX 65 kb) [file 12864_2018_5414_MOESM1_ESM.xlsx]

## Sheet: Feuil1
Table S1: Overall description of the species identified in the pipeline. (e) Top producers of KEPs, relatively to their secretome size.
(a) List of the 250 fungal species analysed in the pipeline. From left to right: name of the sequence file downloaded from the JGI, Scientific Name (NCBI server, May 2018), Number of proteins in the protein catalog, Number of proteins with a Signal Peptide, Number of proteins with at least one transmembrane domain, Deduced number of Secreted Proteins (SPs), Percentage of SPs in the proteome, Phyl…
(b) Species where KEX1, KEX2 or STE13 is absent.
(c) Species with no KEPs.
(d) Species with KEPs in which the total length of repeated motifs is less than 15% of the protein length.

## Sheet: a
TableS1a: List of the 250 fungal species analysed in the pipeline. From left to right: name of the sequence file downloaded from the JGI, Scientific Name based on NCBI server (May 2018), Number of proteins in the proteome, Number of proteins with a Signal Peptide, Number of proteins with at least one transmembrane domain, Deduced number of Secreted Proteins (SPs), Percentage of SPs in the proteom…
Sequence file (JGI)	Scientific Name (NCBI)	Proteome size	SignalP3.0 or SignalP4.0 positives	TMHMM positives	SPs	%of SPs in the proteome	Phylum	TaxId	Morphology	Lifestyle	KEPs	KEP-derived peptides	%KEPS in SPs	Reference#1	Reference#2
Pirin1_GeneCatalog_proteins_20111203	Serendipita_indica_DSM_11827	11767	1465	637	828	7.03663	Basidiomycota	1109443	Filamentous	Endo	3	3	0.362319	PLoS Pathog. 2011 Oct;7(10):e1002290
Orpsp1_1_GeneCatalog_proteins_20140826	Orpinomyces_sp.	18936	2097	663	1434	7.57288	Chytridiomycota	2002773	Filamentous	Endo	15	15	1.04603	Appl Environ Microbiol. 2013 Aug;79(15):4620-34
Phisc1_GeneCatalog_proteins_20150213	Phialocephala_scopiformis	18573	3074	976	2098	11.296	Ascomycota	149040	Filamentous	Endo	15	16	0.714967	Genome Announc. 2016 Feb 25;4(1)
Ascsa1_GeneCatalog_proteins_20140116	Ascocoryne_sarcoides_NRRL_50072	10672	1435	483	952	8.92054	Ascomycota	1016881	Filamentous	Endo	2	2	0.210084	PLoS Genet. 2012;8(3):e1002558
Rhoba1_1_GeneCatalog_proteins_20100913	Rhodotorula_graminis_WP1	7283	1336	413	923	12.6733	Basidiomycota	578459	Unicellular / Yeast / Yeast-like	Endo	4	4	0.433369	Front Microbiol. 2015 Sep 17;6:978
Ascru1_GeneCatalog_proteins_20111107	Ascoidea_rubescens_NRRL_Y17699	6802	512	223	289	4.24875	Ascomycota	983968	Unicellular / Yeast / Yeast-like	Endo	2	2	0.692042	Proc Natl Acad Sci U S A. 2016 Aug 30;113(35):9882-7
HypEC38_3_GeneCatalog_proteins_20130613	Hypoxylon_sp._EC38	12534	2033	646	1387	11.0659	Ascomycota	1001937	Filamentous	Endo	3	3	0.216294	Appl Microbiol Biotechnol. 2017 Jan 12
HypCO275_1_GeneCatalog_proteins_20120126	Hypoxylon_sp._CO27-5	12256	2030	677	1353	11.0395	Ascomycota	1001938	Filamentous	Endo	2	2	0.14782	Appl Microbiol Biotechnol. 2017 Jan 12
HypCI4A_1_GeneCatalog_proteins_20111212	Hypoxylon_sp._CI-4A	11712	1891	574	1317	11.2449	Ascomycota	1001833	Filamentous	Endo	1	1	0.0759301	Appl Microbiol Biotechnol. 2017 Jan 12
DalEC12_1_GeneCatalog_proteins_20111212	Daldinia_eschscholtzii	11173	1766	559	1207	10.8028	Ascomycota	292717	Filamentous	Endo	2	2	0.1657	Appl Microbiol Biotechnol. 2017 Jan 12
Xylhe1_GeneCatalog_proteins_20130827	Xylona_heveae_TC161	8205	996	395	601	7.3248	Ascomycota	1328760	Filamentous	Endo	3	3	0.499168	Fungal Biol. 2016 Jan;120(1):26-42
Cryptococcus_neoformans_H99	Cryptococcus_neoformans_var._grubii_H99	6967	867	324	543	7.79389	Basidiomycota	235443	Unicellular / Yeast / Yeast-like	PatA	1	1	0.184162	PLoS Genet. 2014 Apr 17;10(4):e1004261
Cryne_JEC21_1_GeneCatalog_proteins_20120305	Cryptococcus_neoformans_var._neoformans_JEC21	6475	839	303	536	8.27799	Basidiomycota	214684	Unicellular / Yeast / Yeast-like	PatA	2	2	0.373134	Science. 2005 Feb 25;307(5713):1321-4
Batde5_best_proteins	Batrachochytrium_dendrobatidis_JAM81	8732	1342	401	941	10.7765	Chytridiomycota	684364	Unicellular / Yeast / Yeast-like	PatA	10	10	1.0627	https://genome.jgi.doe.gov/programs/fungi/index.jsf?core=genome&query=Batrachochytrium%20dendrobatidis&searchIn=Genome%20Portals&searchType=Keyword&showAll=false&externallySequenced=true&sortBy=displayNameStr&showRestricted=true&showOnlyPublished=false&showSuperseded=false&sortOrder=asc&rawQuery=false&showFungalOnly=true&activateHighlights=false&programName=all&programYear=all&superkingdom=--any-…
Blade1_GeneCatalog_proteins_20130826	Blastomyces_gilchristii_SLH14081	11343	1228	429	799	7.04399	Ascomycota	559298	Filamentous	PatA	5	5	0.625782	PLoS Genet. 2015 Oct 6;11(10):e1005493
Aspfu_A1163_1_GeneCatalog_proteins_20140107	Aspergillus_fumigatus_A1163	9916	1465	453	1012	10.2057	Ascomycota	451804	Filamentous	PatA	4	4	0.395257	Nature. 2005 Dec 22;438(7071):1151-6
Cocim1_GeneCatalog_proteins_20130907	Coccidioides_immitis_RS	9910	1094	397	697	7.0333	Ascomycota	246410	Unicellular / Yeast / Yeast-like	PatA	5	5	0.71736	Genome Res. 2009 Oct;19(10):1722-31
Exode1_GeneCatalog_proteins_20160902	Exophiala_dermatitidis_NIH/UT8656	9562	1172	431	741	7.74942	Ascomycota	858893	Unicellular / Yeast / Yeast-like	PatA	2	2	0.269906	G3 (Bethesda). 2014 Apr 16;4(4):561-78
Hisca1_GeneCatalog_proteins_20130826	Histoplasma_capsulatum_NAm1	9251	901	296	605	6.53983	Ascomycota	339724	Unicellular / Yeast / Yeast-like	PatA	1	1	0.165289	Genome Res. 2009 Oct;19(10):1722-31
Micca1_GeneCatalog_proteins_20130828	Microsporum_canis_CBS_113480	8915	1100	377	723	8.10993	Ascomycota	554155	Filamentous	PatA	2	2	0.276625	MBio. 2012 Sep 4;3(5):e00259-12
Triru1_GeneCatalog_proteins_20130826	Trichophyton_rubrum_CBS_118892	8707	1127	381	746	8.56782	Ascomycota	559305	Filamentous	PatA	3	3	0.402145	MBio. 2012 Sep 4;3(5):e00259-12
Parbra1_GeneCatalog_proteins_20161024	Paracoccidioides_brasiliensis_Pb18	8390	872	312	560	6.67461	Ascomycota	502780	Unicellular / Yeast / Yeast-like	PatA	2	2	0.357143	PLoS Genet. 2011 Oct;7(10):e1002345
Triver1_GeneCatalog_proteins_20131203	Trichophyton_verrucosum_HKI_0517	8024	991	361	630	7.85145	Ascomycota	663202	Filamentous	PatA	2	2	0.31746	Genome Biol. 2011;12(1):R7
Artbe1_GeneCatalog_proteins_20131209	Trichophyton_benhamiae_CBS_112371	7980	1006	384	622	7.79449	Ascomycota	663331	Filamentous	PatA	1	1	0.160772	Genome Biol. 2011;12(1):R7
Enccu1_GeneCatalog_proteins_20130927	Encephalitozoon_cuniculi_GB-M1_	1996	183	64	119	5.96192	Microsporidia	284813	Unicellular / Yeast / Yeast-like	PatA	#N/A	#N/A	#N/A	Nature. 2001 Nov 22;414(6862):450-3
Enche1_GeneCatalog_proteins_20131209	Encephalitozoon_hellem_ATCC_50504_	1847	139	66	73	3.95236	Microsporidia	907965	Unicellular / Yeast / Yeast-like	PatA	#N/A	#N/A	#N/A	Proc Natl Acad Sci U S A. 2012 Jul 31;109(31):12638-43
Encin1_GeneCatalog_proteins_20131101	Encephalitozoon_intestinalis_ATCC_50506_	1833	140	67	73	3.98254	Microsporidia	876142	Unicellular / Yeast / Yeast-like	PatA	#N/A	#N/A	#N/A	Nat Commun. 2010 Sep 21;1:77
Encro1_GeneCatalog_proteins_20131209	Encephalitozoon_romaleae_SJ-2008_	1831	128	62	66	3.60459	Microsporidia	1178016	Unicellular / Yeast / Yeast-like	PatA	#N/A	#N/A	#N/A	Proc Natl Acad Sci U S A. 2012 Jul 31;109(31):12638-43
Entbi1_GeneCatalog_proteins_20140106	Enterocytozoon_bieneusi_H348	3632	159	71	88	2.42291	Microsporidia	481877	Unicellular / Yeast / Yeast-like	PatA	1	1	1.13636	PLoS Pathog. 2009 Jan;5(1):e1000261
Nempa1_GeneCatalog_proteins_20130904	Nematocida_parisii_ERTm1	2661	309	141	168	6.31342	Microsporidia	881290	Unicellular / Yeast / Yeast-like	PatA	1	1	0.595238	Genome Res. 2012 Dec;22(12):2478-88
Antlo1_GeneCatalog_proteins_20130909	Antonospora_locustae_HM-2013	2606	318	106	212	8.13507	Microsporidia	1284279	Unicellular / Yeast / Yeast-like	PatA	1	1	0.471698	Curr Biol. 2004 May 25;14(10):891-6
Nosce1_GeneCatalog_proteins_20140109	Nosema_ceranae_BRL01	2060	195	59	136	6.60194	Microsporidia	578460	Unicellular / Yeast / Yeast-like	PatA	1	1	0.735294	PLoS Pathog. 2009 Jun;5(6):e1000466
Mucor_circinelloides_v2_filtered_proteins	Mucor_circinelloides_CBS277.49	11719	1090	494	596	5.08576	Mucoromycota	747725	Unicellular / Yeast / Yeast-like	PatA	#N/A	#N/A	#N/A	Curr Biol. 2016 Jun 20;26(12):1577-84
Artol1_GeneCatalog_proteins_20131209	Arthrobotrys_oligospora_ATCC_24927	11479	2043	615	1428	12.4401	Ascomycota	756982	Filamentous	PatA	5	5	0.35014	PLoS Pathog. 2011 Sep;7(9):e1002179
Monha1_GeneCatalog_proteins_20131210	Dactylellina_haptotyla_CBS_200.50	10959	2250	650	1600	14.5999	Ascomycota	1284197	Filamentous	PatA	5	6	0.3125	PLoS Genet. 2013 Nov;9(11):e1003909
Canalb1_GeneCatalog_proteins_20161025	Candida_albicans_SC5314	6040	570	232	338	5.59603	Ascomycota	237561	Unicellular / Yeast / Yeast-like	PatA	4	4	1.18343	Genome Biol. 2007;8(4):R52
Clalu1_2_GeneCatalog_proteins_20150216	Clavispora_lusitaniae_ATCC_42720	5936	659	278	381	6.41846	Ascomycota	306902	Unicellular / Yeast / Yeast-like	PatA	2	2	0.524934	Nature. 2009 Jun 4;459(7247):657-62
Meygui1_GeneCatalog_proteins_20160903	Meyerozyma_guilliermondii_ATCC_6260	5920	613	260	353	5.96284	Ascomycota	294746	Unicellular / Yeast / Yeast-like	PatA	3	3	0.849858	Nature. 2009 Jun 4;459(7247):657-62
Metbi1_GeneCatalog_proteins_20120327	Metschnikowia_bicuspidata_var._bicuspidata_NRRL_YB-4993	5851	650	261	389	6.64844	Ascomycota	869754	Unicellular / Yeast / Yeast-like	PatA	2	2	0.514139	Proc Natl Acad Sci U S A. 2016 Aug 30;113(35):9882-7
Lodelo1_GeneCatalog_proteins_20161026	Lodderomyces_elongisporus_NRRL_YB-4239	5746	502	223	279	4.85555	Ascomycota	379508	Unicellular / Yeast / Yeast-like	PatA	5	5	1.79211	Nature. 2009 Jun 4;459(7247):657-62
Metro1_GeneCatalog_proteins_20161101	Metarhizium_robertsii_ARSEF_23	11688	2056	547	1509	12.9107	Ascomycota	655844	Filamentous	PatA	6	7	0.397614	PLoS Genet. 2011 Jan 6;7(1):e1001264
Beaba1_GeneCatalog_proteins_20130926	Beauveria_bassiana_ARSEF_2860	10364	1926	538	1388	13.3925	Ascomycota	655819	Filamentous	PatA	4	5	0.288184	Sci Rep. 2012;2:483
Metac1_GeneCatalog_proteins_20131003	Metarhizium_acridum_CQMa_102	9849	1527	448	1079	10.9554	Ascomycota	655827	Filamentous	PatA	4	4	0.370714	PLoS Genet. 2011 Jan 6;7(1):e1001264
Cormi1_GeneCatalog_proteins_20131203	Cordyceps_militaris_CM01	9651	1709	500	1209	12.5272	Ascomycota	983644	Filamentous	PatA	2	2	0.165426	Genome Biol. 2011 Nov 23;12(11):R116
Malsy1_1_GeneCatalog_proteins_20140109	Malassezia_sympodialis_ATCC_42132	3517	466	163	303	8.6153	Basidiomycota	1230383	Unicellular / Yeast / Yeast-like	PatA	1	1	0.330033	MBio. 2013 Jan 22;4(1):e00572-12
Conco1_GeneCatalog_proteins_20120213	Conidiobolus_coronatus_NRRL_28638	10635	1564	389	1175	11.0484	Zoopagomycota	796925	Filamentous	PatA	11	12	0.93617	Genome Biol Evol. 2015 May 14;7(6):1590-601
Rozal1_1_GeneCatalog_proteins_20140111	Rozella_allomycis_CSF55	6350	535	202	333	5.24409	Cryptomycota	988480	Unicellular / Yeast / Yeast-like	PatF	#N/A	#N/A	#N/A	Curr Biol. 2013 Aug 19;23(16):1548-53
Tvirens_v2	Trichoderma_virens_Gv29-8	12427	1816	520	1296	10.4289	Ascomycota	413071	Filamentous	PatF**	6	7	0.462963	Genome Biol. 2011;12(4):R40
Tatroviridev2_FrozenGeneCatalog_20100319	Trichoderma_atroviride	11863	1844	545	1299	10.95	Ascomycota	63577	Filamentous	PatF**	6	7	0.461894	Genome Biol. 2011;12(4):R40
Rhiso1_GeneCatalog_proteins_20131028	Rhizoctonia_solani_AG-1_IB	15157	2218	601	1617	10.6683	Basidiomycota	1108050	Filamentous	PatP	#N/A	#N/A	#N/A	J Biotechnol. 2013 Aug 20;167(2):142-55
Armme1_1_GeneCatalog_proteins_20140802	Armillaria_mellea_DSM_3731	14473	1944	623	1321	9.12734	Basidiomycota	1314977	Filamentous	PatP	4	5	0.302801	J Proteome Res. 2013 Jun 7;12(6):2552-70
Monpe1_1_GeneCatalog_proteins_20131213	Moniliophthora_perniciosa_FA553	13560	1131	613	518	3.82006	Basidiomycota	554373	Filamentous	PatP	1	1	0.19305	BMC Genomics. 2008 Nov 18;9:548
Hannosum_v2	Heterobasidion_annosum	13405	1980	624	1356	10.1156	Basidiomycota	13563	Filamentous	PatP	4	4	0.294985	New Phytol. 2012 Jun;194(4):1001-13
Fomme1_GeneCatalog_proteins_20101122	Fomitiporia_mediterranea	11333	1519	520	999	8.81497	Basidiomycota	208960	Filamentous	PatP	12	12	1.2012	Science. 2012 Jun 29;336(6089):1715-9
Venpi1_GeneCatalog_proteins_20150407	Venturia_pyrina	11890	2102	550	1552	13.053	Ascomycota	415593	Filamentous	PatP	20	23	1.28866	J Proteome Res. 2014 Aug 1;13(8):3635-44
Macph1_GeneCatalog_proteins_20131211	Macrophomina_phaseolina_MS6	13806	2293	649	1644	11.9079	Ascomycota	1126212	Filamentous	PatP	5	5	0.304136	BMC Genomics. 2012 Sep 19;13:493
Altal1_GeneCatalog_proteins_20141010	Alternaria_alternata	13469	2375	636	1739	12.9111	Ascomycota	5599	Filamentous	PatP	6	6	0.345026	PLoS One. 2016 Jul 19;11(7):e0157844
Cocvi1_GeneCatalog_proteins_20120501	Bipolaris_victoriae_FI3	12894	2255	606	1649	12.7889	Ascomycota	930091	Filamentous	PatP	9	10	0.545785	PLoS Genet. 2013;9(1):e1003233
Cocca1_GeneCatalog_proteins_20120427	Bipolaris_zeicola_26-R-13	12857	2217	603	1614	12.5535	Ascomycota	930089	Filamentous	PatP	7	7	0.433705	PLoS Genet. 2013;9(1):e1003233
Lepmu1_GeneCatalog_proteins_20110301	Leptosphaeria_maculans	12469	1987	528	1459	11.701	Ascomycota	5022	Filamentous	PatP	5	5	0.3427	Nat Commun. 2011 Feb 15;2:202
Stano2_GeneCatalog_proteins_20110506	Parastagonospora_nodorum_SN15	12380	1950	546	1404	11.3409	Ascomycota	321614	Filamentous	PatP	7	7	0.498575	Plant Cell. 2007 Nov;19(11):3347-68
Pyrenophora_tritici_repentis_proteins	Pyrenophora_tritici-repentis	12169	1918	543	1375	11.2992	Ascomycota	45151	Filamentous	PatP	8	9	0.581818	G3 (Bethesda). 2013 Jan;3(1):41-63
Cocmi1_GeneCatalog_proteins_20120427	Bipolaris_oryzae_ATCC_44560	12007	2096	571	1525	12.7009	Ascomycota	930090	Filamentous	PatP	10	12	0.655738	PLoS Genet. 2013;9(1):e1003233
Pyrtt1_GeneCatalog_proteins_20110408	Pyrenophora_teres_f._teres	11799	1763	520	1243	10.5348	Ascomycota	97479	Filamentous	PatP	6	7	0.482703	Genome Biol. 2010;11(11):R109
Mgraminicolav2	Zymoseptoria_tritici	10933	1620	503	1117	10.2168	Ascomycota	1047171	Filamentous	PatP	12	13	1.07431	PLoS Genet. 2011 Jun;7(6):e1002070
Alternaria_brassicicola_proteins	Alternaria_brassicicola	10688	1648	467	1181	11.0498	Ascomycota	29001	Filamentous	PatP	5	6	0.42337	PLoS Pathog. 2012;8(12):e1003037
Neopa1_GeneCatalog_proteins_20130909	Neofusicoccum_parvum_UCRNP2	10366	1841	506	1335	12.8786	Ascomycota	1287680	Filamentous	PatP	9	9	0.674157	Genome Announc. 2013 Jun 13;1(3)
Dipse1_GeneCatalog_proteins_20150930	Diplodia_seriata	9343	1582	487	1095	11.72	Ascomycota	420778	Filamentous	PatP	8	9	0.730594	BMC Genomics. 2015 Jun 19;16:469
Settu1_GeneCatalog_proteins_20110305	Setosphaeria_turcica_Et28A	11702	1993	568	1425	12.1774	Ascomycota	671987	Filamentous	PatP	8	9	0.561404	PLoS Pathog. 2012;8(12):e1003037	PLoS Genet. 2013;9(1):e1003233
CocheC5_3_GeneCatalog_proteins_20110901	Bipolaris_maydis_C5	13336	2218	644	1574	11.8026	Ascomycota	701091	Filamentous	PatP	11	11	0.698856	PLoS Genet. 2013;9(1):e1003233	PLoS Pathog. 2012;8(12):e1003037
Dotse1_GeneCatalog_proteins_20100818	Dothistroma_septosporum_NZE10	12580	1664	563	1101	8.75199	Ascomycota	675120	Filamentous	PatP	5	5	0.454133	PLoS Genet. 2012;8(11):e1003088	PLoS Pathog. 2012;8(12):e1003037
Cocsa1_GeneCatalog_proteins_20110610	Bipolaris_sorokiniana_ND90Pr	12250	2175	598	1577	12.8735	Ascomycota	665912	Filamentous	PatP	8	8	0.507292	PLoS Genet. 2013;9(1):e1003233	PLoS Pathog. 2012;8(12):e1003037
Zymps1_GeneCatalog_proteins_20141012	Zymoseptoria_pseudotritici_STIR04_2.2.1	11044	1764	508	1256	11.3727	Ascomycota	985140	Filamentous	PatP	7	8	0.557325	Genome Res. 2011 Dec;21(12):2157-66	Proc Natl Acad Sci U S A. 2012 Jul 3;109(27):10954-9
Zymar1_GeneCatalog_proteins_20141012	Zymoseptoria_ardabiliae_STIR04_1.1.1	10788	1887	504	1383	12.8198	Ascomycota	985147	Filamentous	PatP	7	8	0.506146	Genome Res. 2011 Dec;21(12):2157-66	Proc Natl Acad Sci U S A. 2012 Jul 3;109(27):10954-9
Sepmu1_GeneCatalog_proteins_20100915	Sphaerulina_musiva_SO2202	10233	1559	491	1068	10.4368	Ascomycota	692275	Filamentous	PatP	10	10	0.93633	PLoS Pathog. 2012;8(12):e1003037	Proc Natl Acad Sci U S A. 2015 Mar 17;112(11):3451-6
Seppo1_GeneCatalog_proteins_20110720	Sphaerulina_populicola	9739	1411	460	951	9.76486	Ascomycota	215467	Filamentous	PatP	8	8	0.84122	PLoS Pathog. 2012;8(12):e1003037	Proc Natl Acad Sci U S A. 2015 Mar 17;112(11):3451-6
Phach1_GeneCatalog_proteins_20150930	Phaeomoniella_chlamydospora	6907	710	233	477	6.90604	Ascomycota	158046	Filamentous	PatP	2	3	0.419287	BMC Genomics. 2015 Jun 19;16:469
Botci1_GeneCatalog_proteins_20110903	Botrytis_cinerea	16447	1831	564	1267	7.70353	Ascomycota	40559	Filamentous	PatP	11	13	0.868193	PLoS Genet. 2011 Aug;7(8):e1002230
Sclsc1_GeneCatalog_proteins_20110903	Sclerotinia_sclerotiorum	14503	1492	441	1051	7.24678	Ascomycota	5180	Filamentous	PatP	5	6	0.475737	PLoS Genet. 2011 Aug;7(8):e1002230
Marbr1_GeneCatalog_proteins_20141203	Marssonina_brunnea_f._sp._'multigermtubi'	10027	1607	528	1079	10.7609	Ascomycota	698441	Filamentous	PatP	1	1	0.0926784	BMC Genomics. 2012 Aug 9;13:382
Blugr1_GeneCatalog_proteins_20131023	Blumeria_graminis_f._sp._hordei_DH14	6470	1088	286	802	12.3957	Ascomycota	546991	Filamentous	PatP	3	3	0.374065	Science. 2010 Dec 10;330(6010):1543-6
Rhimi_ATCC11559_1_GeneCatalog_proteins_20150408	Rhizopus_microsporus	11355	908	367	541	4.76442	Mucoromycota	58291	Filamentous	PatP	3	3	0.554529	Proc Natl Acad Sci U S A. 2016 Dec 27;113(52):15102-15107
Micld1_GeneCatalog_proteins_20161101	Microbotryum_lychnidis-dioicae_p1A1_Lamole	7819	1288	418	870	11.1267	Basidiomycota	683840	Unicellular / Yeast / Yeast-like	PatP	#N/A	#N/A	#N/A	BMC Genomics. 2015 Jun 16;16:461
Melli1_GeneCatalog_proteins_20150227	Melampsora_lini	16335	1284	339	945	5.78512	Basidiomycota	5261	Filamentous	PatP	15	19	1.5873	Front Plant Sci. 2014 Mar 24;5:98
Pucgr2_GeneCatalog_proteins_20150718	Puccinia_graminis_f._sp._tritici	15979	2640	640	2000	12.5164	Basidiomycota	56615	Filamentous	PatP	6	6	0.3	Proc Natl Acad Sci U S A. 2011 May 31;108(22):9166-71
Mixos1_GeneCatalog_proteins_20120207	Mixia_osmundae_IAM_14324	6903	1312	354	958	13.878	Basidiomycota	764103	Unicellular / Yeast / Yeast-like	PatP	2	2	0.208768	New Phytol. 2014 Apr;202(2):554-64
Gaegr1_GeneCatalog_proteins_20131203	Gaeumannomyces_tritici_R3-111a-1	14655	2881	745	2136	14.5752	Ascomycota	644352	Filamentous	PatP	13	16	0.608614	G3 (Bethesda). 2015 Sep 28;5(12):2539-45
Colfi1_GeneCatalog_proteins_20160218	Colletotrichum_fioriniae_PJ7	13759	2814	706	2108	15.3209	Ascomycota	1445577	Filamentous	PatP	13	14	0.616698	Genome Announc. 2014 Apr 10;2(2)
Fusox2_GeneCatalog_proteins_20150720	Fusarium_oxysporum_f._sp._lycopersici_4287	27347	3707	1063	2644	9.66834	Ascomycota	426428	Filamentous	PatP	3	3	0.113464	Nature. 2010 Mar 18;464(7287):367-73
Fusve2_GeneCatalog_proteins_20150720	Fusarium_verticillioides_7600	20553	2634	932	1702	8.28103	Ascomycota	334819	Filamentous	PatP	7	7	0.411281	Nature. 2010 Mar 18;464(7287):367-73
Fusfu1_GeneCatalog_proteins_20130915	Fusarium_fujikuroi_IMI_58289	14813	2370	628	1742	11.7599	Ascomycota	1279085	Filamentous	PatP	4	5	0.229621	PLoS Pathog. 2013;9(6):e1003475
Colhig2_GeneCatalog_proteins_20170214	Colletotrichum_higginsianum_IMI_349063	14651	2925	762	2163	14.7635	Ascomycota	759273	Filamentous	PatP	11	13	0.508553	Genome Announc. 2016 Aug 18;4(4)
Fusgr1_GeneCatalog_proteins_20110524	Fusarium_graminearum	13322	2085	585	1500	11.2596	Ascomycota	5518	Filamentous	PatP	8	8	0.533333	Science. 2007 Sep 7;317(5843):1400-2.
Micbo1_GeneCatalog_proteins_20151118	Microdochium_bolleyi	13177	2660	759	1901	14.4267	Ascomycota	196109	Filamentous	PatP	4	4	0.210416	Genome Announc. 2016 Apr 28;4(2)
Colgr1_GeneCatalog_proteins_20130906	Colletotrichum_graminicola_M1.001	12006	2209	620	1589	13.235	Ascomycota	645133	Filamentous	PatP	9	9	0.566394	Nat Genet. 2012 Sep;44(9):1060-5
Eutla1_GeneCatalog_proteins_20130916	Eutypa_lata_UCREL1	11685	1966	536	1430	12.2379	Ascomycota	1287681	Filamentous	PatP	3	3	0.20979	Genome Announc. 2013 May 30;1(3)
Maggr1_GeneCatalog_proteins_20110524	Magnaporthe_grisea	11054	2332	611	1721	15.569	Ascomycota	148305	Filamentous	PatP	9	10	0.522952	Nature. 2005 Apr 21;434(7036):980-6.
Diaam1_GeneCatalog_proteins_20150926	Diaporthe_ampelina	10704	1829	488	1341	12.528	Ascomycota	1214573	Filamentous	PatP	6	6	0.447427	BMC Genomics. 2015 Jun 19;16:469
Verda1_GeneCatalog_proteins_20110524	Verticillium_dahliae	10535	1926	497	1429	13.5643	Ascomycota	27337	Filamentous	PatP	4	4	0.279916	PLoS Pathog. 2011 Jul;7(7):e1002137
Veral1_GeneCatalog_proteins_20131030	Verticillium_alfalfae_VaMs.102	10221	1796	447	1349	13.1983	Ascomycota	526221	Filamentous	PatP	5	5	0.370645	PLoS Pathog. 2011 Jul;7(7):e1002137
Phaal1_GeneCatalog_proteins_20130924	Phaeoacremonium_minimum_UCRPA7	8834	1229	429	800	9.05592	Ascomycota	1286976	Filamentous	PatP	7	8	0.875	Genome Announc. 2013 Jun 27;1(3)
Grocl1_GeneCatalog_proteins_20131017	Grosmannia_clavigera_kw1407	8312	1337	435	902	10.8518	Ascomycota	655863	Filamentous	PatP	4	4	0.443459	Proc Natl Acad Sci U S A. 2011 Feb 8;108(6):2504-9
Tapde1_1_GeneCatalog_proteins_20130601	Taphrina_deformans	4609	487	194	293	6.35713	Ascomycota	5011	Unicellular / Yeast / Yeast-like	PatP	1	1	0.341297	MBio. 2013 Apr 30;4(3):e00055-13
Spore1_GeneCatalog_proteins_20131031	Sporisorium_reilianum_SRZ2	6648	1345	444	901	13.5529	Basidiomycota	999809	Unicellular / Yeast / Yeast-like	PatP	4	4	0.443951	Science. 2010 Dec 10;330(6010):1546-8
Ustilago_maydis	Ustilago_maydis	6522	1189	385	804	12.3275	Basidiomycota	5270	Unicellular / Yeast / Yeast-like	PatP	5	5	0.621891	Nature. 2006 Nov 2;444(7115):97-101
Paxru2_GeneCatalog_proteins_20151118	Paxillus_rubicundulus_Ve08.2h10	18999	1603	660	943	4.96342	Basidiomycota	930991	Filamentous	Sapr	#N/A	#N/A	#N/A	Nat Genet. 2015 Apr;47(4):410-5
Fishe1_GeneCatalog_proteins_20130122	Fistulina_hepatica	11244	1421	560	861	7.65742	Basidiomycota	40457	Filamentous	Sapr	#N/A	#N/A	#N/A	Fungal Genet Biol. 2015 Mar;76:78-92
Pycci1_GeneCatalog_proteins_20140109	Trametes_cinnabarina_BRFM137	10442	1497	509	988	9.46179	Basidiomycota	1445587	Filamentous	Sapr	#N/A	#N/A	#N/A	BMC Genomics. 2014 Jun 18;15:486
Sphst1_GeneCatalog_proteins_20120430	Sphaerobolus_stellatus	35274	4041	1199	2842	8.05693	Basidiomycota	68786	Filamentous	Sapr	14	14	0.492611	Nat Genet. 2015 Apr;47(4):410-5
Fibsp1_GeneCatalog_proteins_20131122	Fibularhizoctonia_sp._CBS_109695	32946	5153	1674	3479	10.5597	Basidiomycota	436010	Filamentous	Sapr	25	28	0.718597	Mol Biol Evol. 2016 Apr;33(4):959-70
Exigl1_GeneCatalog_proteins_20130529	Exidia_glandulosa	26765	5322	1445	3877	14.4853	Basidiomycota	5219	Filamentous	Sapr	13	13	0.335311	Mol Biol Evol. 2016 Apr;33(4):959-70
Aurde3_1_GeneCatalog_proteins_20130729	Auricularia_subglabra	25459	4731	1172	3559	13.9793	Basidiomycota	1331295	Filamentous	Sapr	10	10	0.280978	Science. 2012 Jun 29;336(6089):1715-9
Gymlu1_GeneCatalog_proteins_20110803	Gymnopus_luxurians	22057	3418	1222	2196	9.95602	Basidiomycota	206324	Filamentous	Sapr	7	7	0.318761	Nat Genet. 2015 Apr;47(4):410-5
Pilcr1_GeneCatalog_proteins_20120328	Plicaturopsis_crispa	21583	1785	950	835	3.86879	Basidiomycota	139390	Filamentous	Sapr	3	3	0.359281	Nat Genet. 2015 Apr;47(4):410-5
Galma1_GeneCatalog_proteins_20110628	Galerina_marginata	21461	3452	1143	2309	10.7591	Basidiomycota	109633	Filamentous	Sapr	8	8	0.34647	Proc Natl Acad Sci U S A. 2014 Jul 8;111(27):9923-8
Hypsu1_GeneCatalog_proteins_20110822	Hypholoma_sublateritium	17911	2845	836	2009	11.2166	Basidiomycota	71945	Filamentous	Sapr	7	8	0.348432	Nat Genet. 2015 Apr;47(4):410-5
Pospl1_FilteredModels2_proteins	Postia_placenta_Mad-698-R	17173	2570	915	1655	9.63722	Basidiomycota	561896	Filamentous	Sapr	9	11	0.543807	Proc Natl Acad Sci U S A. 2009 Feb 10;106(6):1954-9.
Schpa1_GeneCatalog_proteins_20131225	Schizopora_paradoxa	17098	2288	804	1484	8.67938	Basidiomycota	27342	Unicellular / Yeast / Yeast-like	Sapr	4	4	0.269542	J Biotechnol. 2015 Oct 10;211:42-3
Botbo1_GeneCatalog_proteins_20110803	Botryobasidium_botryosum	16526	2701	827	1874	11.3397	Basidiomycota	264124	Filamentous	Sapr	1	1	0.0533618	Proc Natl Acad Sci U S A. 2014 Jul 8;111(27):9923-8
Jaaar1_GeneCatalog_proteins_20110803	Jaapia_argillacea	16419	1604	962	642	3.9101	Basidiomycota	202697	Filamentous	Sapr	1	1	0.155763	Proc Natl Acad Sci U S A. 2014 Jul 8;111(27):9923-8
Phlbr1_GeneCatalog_proteins_20110325	Phlebia_brevispora_HHB-7030_SS6	16170	1679	943	736	4.55164	Basidiomycota	747484	Filamentous	Sapr	5	8	0.679348	Mycologia. 2013 Nov-Dec;105(6):1350-73
Serpula_lacrymans_S7_3_v2	Serpula_lacrymans_var._lacrymans_S7.3	14495	1584	537	1047	7.22318	Basidiomycota	936435	Filamentous	Sapr	2	2	0.191022	Science. 2011 Aug 5;333(6043):762-5
Trave1_GeneCatalog_proteins_20101111	Trametes_versicolor	14296	2213	760	1453	10.1637	Basidiomycota	5325	Filamentous	Sapr	1	1	0.0688231	Science. 2012 Jun 29;336(6089):1715-9
Stehi1_GeneCatalog_proteins_20101026	Stereum_hirsutum_FP-91666_SS1	14072	2114	702	1412	10.0341	Basidiomycota	721885	Filamentous	Sapr	7	7	0.495751	Science. 2012 Jun 29;336(6089):1715-9
Cylto1_GeneCatalog_proteins_20130411	Cylindrobasidium_torrendii_FP15055_ss-10	13940	2175	693	1482	10.6313	Basidiomycota	1314674	Filamentous	Sapr	4	5	0.269906	Fungal Genet Biol. 2015 Mar;76:78-92
Phaca1_GeneCatalog_proteins_20101213	Phanerochaete_carnosa_HHB-10118-sp	13937	1679	803	876	6.28543	Basidiomycota	650164	Filamentous	Sapr	4	4	0.456621	BMC Genomics. 2012 Sep 2;13:444
Fompi3_GeneCatalog_proteins_20120705	Fomitopsis_pinicola_FP-58527_SS1	13885	2067	701	1366	9.83795	Basidiomycota	743788	Filamentous	Sapr	9	10	0.658858	Science. 2012 Jun 29;336(6089):1715-9
Laesu1_GeneCatalog_proteins_20130128	Laetiporus_sulphureus_var._sulphureus	13774	1375	762	613	4.45041	Basidiomycota	447506	Filamentous	Sapr	5	5	0.815661	Mol Biol Evol. 2016 Apr;33(4):959-70
Conpu1_GeneCatalog_proteins_20101116	Coniophora_puteana	13761	2090	673	1417	10.2972	Basidiomycota	80637	Filamentous	Sapr	11	11	0.776288	Science. 2012 Jun 29;336(6089):1715-9
Sissu1_GeneCatalog_proteins_20130130	Sistotremastrum_suecicum	13657	1962	681	1281	9.37981	Basidiomycota	467971	Filamentous	Sapr	12	14	0.936768	Mol Biol Evol. 2016 Apr;33(4):959-70
Phchr2_GeneCatalog_proteins_20131210	Phanerochaete_chrysosporium_RP-78	13602	1640	680	960	7.05779	Basidiomycota	273507	Filamentous	Sapr	3	3	0.3125	Fungal Genet Biol. 2014 Nov;72:82-90
Coprinopsis_cinerea	Coprinopsis_cinerea	13393	1617	660	957	7.14552	Basidiomycota	5346	Filamentous	Sapr	4	4	0.417973	Proc Natl Acad Sci U S A. 2010 Jun 29;107(26):11889-94
Hydpi2_GeneCatalog_proteins_20120511	Hydnomerulius_pinastri	13270	1859	638	1221	9.20121	Basidiomycota	388859	Filamentous	Sapr	4	4	0.3276	Nat Genet. 2015 Apr;47(4):410-5
Obbri1_GeneCatalog_proteins_20140615	Obba_rivulosa	13206	1615	850	765	5.79282	Basidiomycota	1052685	Filamentous	Sapr	1	1	0.130719	Genome Announc. 2016 Sep 15;4(5)
Calco1_GeneCatalog_proteins_20130417	Calocera_cornea	13177	2288	655	1633	12.3928	Basidiomycota	29889	Filamentous	Sapr	8	9	0.489896	Mol Biol Evol. 2016 Apr;33(4):959-70
Neole1_GeneCatalog_proteins_20130125	Neolentinus_lepideus	13164	1391	786	605	4.59587	Basidiomycota	38799	Filamentous	Sapr	1	1	0.165289	Mol Biol Evol. 2016 Apr;33(4):959-70
Sisni1_GeneCatalog_proteins_20130806	Sistotremastrum_niveocremeum_HHB9708	13080	1811	626	1185	9.05963	Basidiomycota	1314777	Filamentous	Sapr	12	13	1.01266	Mol Biol Evol. 2016 Apr;33(4):959-70
Gansp1_GeneCatalog_proteins_20110326	Ganoderma_sp._10597_SS1	12910	2110	736	1374	10.6429	Basidiomycota	767862	Filamentous	Sapr	3	3	0.218341	Mycologia. 2013 Nov-Dec;105(6):1350-73
Wolco1_GeneCatalog_proteins_20100915	Wolfiporia_cocos_MD-104_SS10	12746	1739	627	1112	8.72431	Basidiomycota	742152	Filamentous	Sapr	5	5	0.44964	Science. 2012 Jun 29;336(6089):1715-9
Calvi1_GeneCatalog_proteins_20130829	Calocera_viscosa	12378	2091	649	1442	11.6497	Basidiomycota	63146	Filamentous	Sapr	11	12	0.762829	Mol Biol Evol. 2016 Apr;33(4):959-70
PleosPC15_2_GeneModels_FilteredModels1_aa	Pleurotus_ostreatus_PC15	12330	1948	657	1291	10.4704	Basidiomycota	1137138	Filamentous	Sapr	10	10	0.774593	Proc Natl Acad Sci U S A. 2014 Jul 8;111(27):9923-8
Dicsq1_GeneCatalog_proteins_20101110	Dichomitus_squalens_LYAD-421_SS1	12290	1838	636	1202	9.78031	Basidiomycota	732165	Filamentous	Sapr	2	2	0.166389	Science. 2012 Jun 29;336(6089):1715-9
Daequ1_GeneCatalog_proteins_20130110	Daedalea_quercina	12199	2009	674	1335	10.9435	Basidiomycota	40437	Filamentous	Sapr	8	8	0.599251	Mol Biol Evol. 2016 Apr;33(4):959-70
Ceriporiopsis_subvermispora	Gelatoporia_subvermispora_B	12125	1758	630	1128	9.30309	Basidiomycota	914234	Filamentous	Sapr	3	3	0.265957	Proc Natl Acad Sci U S A. 2012 Apr 3;109(14):5458-63
Phlgi1_GeneCatalog_proteins_20110614	Phlebiopsis_gigantea	11891	1483	714	769	6.46708	Basidiomycota	82310	Filamentous	Sapr	7	7	0.910273	PLoS Genet. 2014 Dec 4;10(12):e1004759
Glotr1_1_GeneCatalog_proteins_20100921	Gloeophyllum_trabeum	11846	1670	593	1077	9.09168	Basidiomycota	104355	Filamentous	Sapr	5	5	0.464253	Science. 2012 Jun 29;336(6089):1715-9. doi: 10.1126/science.1221748.
Punst1_GeneCatalog_proteins_20101026	Punctularia_strigosozonata	11538	1800	565	1235	10.7038	Basidiomycota	202698	Filamentous	Sapr	3	3	0.242915	Science. 2012 Jun 29;336(6089):1715-9. doi: 10.1126/science.1221748.
Abisporus_varburnettii	Agaricus_bisporus_var._burnettii_JB137-S8	11289	1408	479	929	8.22925	Basidiomycota	597362	Filamentous	Sapr	4	5	0.430571	Proc Natl Acad Sci U S A. 2012 Oct 23;109(43):17501-6
Volvo1_GeneCatalog_proteins_20130703	Volvariella_volvacea_V23	11084	1681	614	1067	9.62649	Basidiomycota	706473	Filamentous	Sapr	4	4	0.374883	PLoS One. 2013;8(3):e58294
Abisporus_varbisporusH97	Agaricus_bisporus_var._bisporus_H97	10438	1338	477	861	8.24871	Basidiomycota	936046	Filamentous	Sapr	3	4	0.348432	Proc Natl Acad Sci U S A. 2012 Oct 23;109(43):17501-6
Dacsp1_GeneCatalog_proteins_20110131	Dacryopinax_primogenitus	10242	1517	527	990	9.66608	Basidiomycota	1858805	Filamentous	Sapr	2	2	0.20202	Science. 2012 Jun 29;336(6089):1715-9
Fibra1_GeneCatalog_proteins_20131030	Fibroporia_radiculosa_TFFH_294	9262	1351	480	871	9.40402	Basidiomycota	1078123	Filamentous	Sapr	8	9	0.918485	Appl Environ Microbiol. 2012 Apr;78(7):2272-81
Triol1_GeneCatalog_proteins_20140430	Cutaneotrichosporon_oleaginosum	8322	1537	459	1078	12.9536	Basidiomycota	879819	Unicellular / Yeast / Yeast-like	Sapr	3	3	0.278293	MBio. 2015 Jul 21;6(4):e00918
Treme1_best_proteins	Tremella_mesenterica_DSM_1558	8313	845	279	566	6.80861	Basidiomycota	578456	Filamentous	Sapr	6	6	1.06007	Science. 2012 Jun 29;336(6089):1715-9
Ompol1_GeneCatalog_proteins_20130516	Omphalotus_olearius	8171	1446	509	937	11.4674	Basidiomycota	72120	Filamentous	Sapr	4	4	0.426894	Chem Biol. 2012 Jun 22;19(6):772-83
Leugo1_1_GeneCatalog_proteins_20141030	Leucoagaricus_gongylophorus	5420	376	192	184	3.39483	Basidiomycota	79220	Filamentous	Sapr	1	1	0.543478	Environ Microbiol. 2013 Jun;79(12):3770-8
Walse1_GeneCatalog_proteins_20100910	Wallemia_sebi	5284	471	189	282	5.33687	Basidiomycota	148960	Filamentous	Sapr	6	7	2.12766	Fungal Genet Biol. 2012 Mar;49(3):217-26
Walic1_GeneCatalog_proteins_20131017	Wallemia_ichthyophaga_EXF-994	4863	455	173	282	5.79889	Basidiomycota	1299270	Filamentous	Sapr	6	9	2.12766	BMC Genomics. 2013 Sep 13;14:617
Ganpr1_GeneCatalog_proteins_20111215	Gonapodya_prolifera	13902	2116	874	1242	8.93397	Chytridiomycota	1123529	Filamentous	Sapr	1	1	0.0805153	Genome Biol Evol. 2015 May 14;7(6):1590-601
Parsp1_GeneCatalog_proteins_20141011	Paraphaeosphaeria_sporulosa	14745	2967	784	2183	14.805	Ascomycota	1460663	Filamentous	Sapr	19	20	0.870362	PLoS One. 2016 Jul 19;11(7):e0157844
Glost2_GeneCatalog_proteins_20140303	Glonium_stellatum	14362	2291	743	1548	10.7784	Ascomycota	574774	Filamentous	Sapr	3	3	0.193798	Nat Commun. 2016 Sep 7;7:12662
Leppa1_GeneCatalog_proteins_20130322	Lepidopterella_palustris	13870	1889	691	1198	8.63735	Ascomycota	741139	Filamentous	Sapr	1	1	0.0834725	Nat Commun. 2016 Sep 7;7:12662
Hyspu1_1_GeneCatalog_proteins_20150205	Hysterium_pulicare	12352	1794	512	1282	10.3789	Ascomycota	100027	Filamentous	Sapr	8	9	0.624025	PLoS Pathog. 2012;8(12):e1003037
Rhyru1_1_GeneCatalog_proteins_20150204	Rhytidhysteron_rufulum	12117	1797	502	1295	10.6875	Ascomycota	37885	Filamentous	Sapr	13	13	1.00386	PLoS Pathog. 2012;8(12):e1003037
Aurpu_var_pul1_GeneCatalog_proteins_20130219	Aureobasidium_pullulans_EXF-150	11866	1807	538	1269	10.6944	Ascomycota	1043002	Unicellular / Yeast / Yeast-like	Sapr	4	4	0.315209	BMC Genomics. 2014 Jul 1;15:549
Aurpu_var_sub1_GeneCatalog_proteins_20120515	Aureobasidium_subglaciale_EXF-2481	10809	1712	519	1193	11.0371	Ascomycota	1043005	Unicellular / Yeast / Yeast-like	Sapr	2	2	0.167645	BMC Genomics. 2014 Jul 1;15:549
Aurpu_var_mel1_GeneCatalog_proteins_20130418	Aureobasidium_melanogenum_CBS_110374	10594	1465	495	970	9.15613	Ascomycota	1043003	Unicellular / Yeast / Yeast-like	Sapr	3	3	0.309278	BMC Genomics. 2014 Jul 1;15:549
Bauco1_GeneCatalog_proteins_20110511	Baudoinia_panamericana_UAMH_10762	10513	1331	449	882	8.38961	Ascomycota	717646	Filamentous	Sapr	2	2	0.226757	PLoS Pathog. 2012;8(12):e1003037
Aciri1_meta_GeneCatalog_proteins_20111216	Acidomyces_richmondensis_BFW	10352	1397	504	893	8.62635	Ascomycota	766039	Filamentous	Sapr	1	1	0.111982	Front Microbiol. 2016 Mar 3;7:238
Aurpu_var_nam1_GeneCatalog_proteins_20130418	Aureobasidium_namibiae_CBS_147.97	10266	1452	493	959	9.34152	Ascomycota	1043004	Unicellular / Yeast / Yeast-like	Sapr	4	4	0.417101	BMC Genomics. 2014 Jul 1;15:549
Pendi1_GeneCatalog_proteins_20131020	Penicillium_digitatum_PHI26	9118	1076	356	720	7.89647	Ascomycota	1170229	Filamentous	Sapr	#N/A	#N/A	#N/A	BMC Genomics. 2012 Nov 21;13:646
Pensub1_GeneCatalog_proteins_20160929	Penicillium_subrubescens	14188	1896	561	1335	9.40936	Ascomycota	1316194	Filamentous	Sapr	3	3	0.224719	J Biotechnol. 2017 Feb 16;246:1-3
PenchWisc1_1_GeneCatalog_proteins_20140114	Penicillium_rubens_Wisconsin_54-1255	13671	1760	549	1211	8.85817	Ascomycota	500485	Filamentous	Sapr	7	8	0.578035	Nat Biotechnol. 2008 Oct;26(10):1161-8
Aspfo1_GeneCatalog_proteins_20120615	Aspergillus_luchuensis_CBS_106.47	13530	2152	687	1465	10.8278	Ascomycota	1137211	Filamentous	Sapr	5	6	0.341297	Genome Biol. 2017 Feb 14;18(1):28
Aspbr1_GeneCatalog_proteins_20120615	Aspergillus_brasiliensis	13000	2115	674	1441	11.0846	Ascomycota	319629	Filamentous	Sapr	5	6	0.346981	Genome Biol. 2017 Feb 14;18(1):28
Penth1_GeneCatalog_proteins_20150617	Penicillium_thymicola	12467	1626	541	1085	8.70298	Ascomycota	293382	Filamentous	Sapr	2	2	0.184332	Fungal Biol. 2016 Aug;120(8):1041-9
Aspor1_GeneCatalog_proteins_20120808	Aspergillus_oryzae_RIB40	12030	1837	550	1287	10.6983	Ascomycota	510516	Filamentous	Sapr	11	12	0.854701	Nature. 2005 Dec 22;438(7071):1157-61
Aspni7_GeneCatalog_proteins_20131226	Aspergillus_nidulans	11910	1893	617	1276	10.7137	Ascomycota	162425	Filamentous	Sapr	8	8	0.626959	Nature. 2005 Dec 22;438(7071):1105-15
Aspac1_filtered_proteins	Aspergillus_aculeatus_ATCC_16872	10828	1768	541	1227	11.3317	Ascomycota	690307	Filamentous	Sapr	6	6	0.488998	Genome Biol. 2017 Feb 14;18(1):28
Aspnid1_GeneCatalog_proteins_20110130	Aspergillus_niger_ATCC_1015	10680	1624	471	1153	10.7959	Ascomycota	380704	Filamentous	Sapr	1	1	0.0867303	Genome Res. 2011 Jun;21(6):885-97
Neofi1_GeneCatalog_proteins_20120815	Aspergillus_fischeri_NRRL_181	10406	1606	497	1109	10.6573	Ascomycota	331117	Filamentous	Sapr	1	1	0.0901713	Nucleic Acids Res. 2012 Jan;40(Database issue):D653-9
Eurhe1_GeneCatalog_proteins_20120312	Aspergillus_ruber	10076	1380	451	929	9.21993	Ascomycota	396024	Filamentous	Sapr	6	6	0.645856	Nat Commun. 2014 May 9;5:3745
Penox1_GeneCatalog_proteins_20131211	Penicillium_oxalicum_114-2	9979	1381	434	947	9.48993	Ascomycota	933388	Filamentous	Sapr	2	2	0.211193	PLoS One. 2013;8(2):e55185
Uncre1_GeneCatalog_proteins_20131024	Uncinocarpus_reesii_1704	7798	923	300	623	7.98923	Ascomycota	336963	Filamentous	Sapr	3	3	0.481541	Genome Res. 2009 Oct;19(10):1722-31
Glalo1_GeneCatalog_proteins_20131021	Glarea_lozoyensis_ATCC_20868	13083	2127	586	1541	11.7786	Ascomycota	1116229	Filamentous	Sapr	11	12	0.713822	BMC Genomics. 2013 May 20;14:339
Rhior3_proteins	Rhizopus_delemar_RA_99-880	17467	1282	432	850	4.86632	Mucoromycota	246409	Filamentous	Sapr	8	8	0.941176	PLoS Genet. 2009 Jul;5(7):e1000549
Phycomyces_blakesleeanus_v2_filtered_proteins	Phycomyces_blakesleeanus_NRRL_1555m	16528	1358	590	768	4.64666	Mucoromycota	763407	Filamentous	Sapr	2	3	0.260417	Curr Biol. 2016 Jun 20;26(12):1577-84
Morel2_GeneCatalog_proteins_20151120	Mortierella_elongata_AG-77	14969	2296	980	1316	8.7915	Mucoromycota	1314771	Filamentous	Sapr	11	12	0.835866	Environ Microbiol. 2017 Jan 11
Liccor1_GeneCatalog_proteins_20160306	Lichtheimia_corymbifera_JMRC-FSU-9682	13404	1488	598	890	6.63981	Mucoromycota	1263082	Filamentous	Sapr	4	4	0.449438	PLoS Genet. 2014 Aug 14;10(8):e1004496
Pyrco1_GeneCatalog_proteins_20131110	Pyronema_omphalodes_CBS_100304	13367	1778	525	1253	9.37383	Ascomycota	1076935	Filamentous	Sapr	7	7	0.558659	PLoS Genet. 2013;9(9):e1003820
Hypbu1_GeneCatalog_proteins_20120125	Hyphopichia_burtonii_NRRL_Y-1933	6005	497	203	294	4.89592	Ascomycota	984485	Unicellular / Yeast / Yeast-like	Sapr	#N/A	#N/A	#N/A	Proc Natl Acad Sci U S A. 2016 Aug 30;113(35):9882-7
Pstipitisv2	Pichia_stipitis	5807	506	228	278	4.78733	Ascomycota	4924	Unicellular / Yeast / Yeast-like	Sapr	#N/A	#N/A	#N/A	Nature Biotech., 25, 319 – 326.
Nadfu1_GeneCatalog_proteins_20110909	Nadsonia_fulvescens_var._elongata_DSM_6958	5657	468	227	241	4.26021	Ascomycota	857566	Unicellular / Yeast / Yeast-like	Sapr	#N/A	#N/A	#N/A	Proc Natl Acad Sci U S A. 2016 Aug 30;113(35):9882-7
Cante1_filtered_proteins_v1_1	Candida_tenuis_NRRL_Y-1498	5533	462	208	254	4.59064	Ascomycota	45596	Unicellular / Yeast / Yeast-like	Sapr	#N/A	#N/A	#N/A	Proc Natl Acad Sci U S A. 2011 Aug 9;108(32):13212-7
Hanpo2_GeneCatalog_proteins_20100927	Ogataea_polymorpha_NCYC_495_leu1.1	5177	449	219	230	4.44273	Ascomycota	638633	Unicellular / Yeast / Yeast-like	Sapr	#N/A	#N/A	#N/A	Proc Natl Acad Sci U S A. 2016 Aug 30;113(35):9882-7
Picpa1_GeneCatalog_proteins_20130227	Komagataella_pastoris	5040	403	192	211	4.18651	Ascomycota	4922	Unicellular / Yeast / Yeast-like	Sapr	#N/A	#N/A	#N/A	Nat Biotechnol. 2009 Jun;27(6):561-6
Torde1_GeneCatalog_proteins_20150128	Torulaspora_delbrueckii_CBS_1146	4972	413	212	201	4.04264	Ascomycota	1076872	Unicellular / Yeast / Yeast-like	Sapr	#N/A	#N/A	#N/A	Proc Natl Acad Sci U S A. 2011 Dec 13;108(50):20024-9
Ashgo1_1_GeneCatalog_proteins_20140830	Eremothecium_gossypii_ATCC_10895	4768	480	215	265	5.55789	Ascomycota	284811	Unicellular / Yeast / Yeast-like	Sapr	#N/A	#N/A	#N/A	Science. 2004 Apr 9;304(5668):304-7
Sacce1_GeneCatalog_proteins_20101210	Saccharomyces_cerevisiae_S288C	6575	633	315	318	4.8365	Ascomycota	559292	Unicellular / Yeast / Yeast-like	Sapr	1	1	0.314465	Science. 1996 Oct 25;274(5287):546, 563-7
Yarli1_GeneCatalog_proteins_20130122	Yarrowia_lipolytica_CLIB122	6447	803	291	512	7.94168	Ascomycota	284591	Unicellular / Yeast / Yeast-like	Sapr	3	4	0.585938	Nature. 2004 Jul 1;430(6995):35-44
Wican1_GeneCatalog_proteins_20110222	Wickerhamomyces_anomalus_NRRL_Y-366-8	6423	508	231	277	4.31263	Ascomycota	683960	Unicellular / Yeast / Yeast-like	Sapr	4	5	1.44404	Proc Natl Acad Sci U S A. 2016 Aug 30;113(35):9882-7
Babin1_GeneCatalog_proteins_20120306	Babjeviella_inositovora_NRRL_Y-12698	6403	620	263	357	5.57551	Ascomycota	984486	Unicellular / Yeast / Yeast-like	Sapr	1	1	0.280112	Proc Natl Acad Sci U S A. 2016 Aug 30;113(35):9882-7
Debha1_GeneCatalog_proteins_20130209	Debaryomyces_hansenii	6272	459	203	256	4.08163	Ascomycota	4959	Unicellular / Yeast / Yeast-like	Sapr	2	2	0.78125	FEMS Yeast Res. 2008 Sep;8(6):846-57
Arxad1_GeneCatalog_proteins_20141211	Blastobotrys_adeninivorans	6119	674	252	422	6.89655	Ascomycota	409370	Unicellular / Yeast / Yeast-like	Sapr	4	4	0.947867	Biotechnol Biofuels. 2014 Apr 24;7:66
Cybja1_GeneCatalog_proteins_20121210	Cyberlindnera_jadinii_NRRL_Y-1542	6038	587	233	354	5.86287	Ascomycota	983966	Unicellular / Yeast / Yeast-like	Sapr	1	1	0.282486	Proc Natl Acad Sci U S A. 2016 Aug 30;113(35):9882-7
Kurca1_GeneCatalog_proteins_20160819	Kuraishia_capsulata_CBS_1993	6029	539	260	279	4.62763	Ascomycota	1382522	Unicellular / Yeast / Yeast-like	Sapr	3	3	1.07527	Genome Biol Evol. 2013;5(12):2524-39
Spapa3_filtered_proteins	Spathaspora_passalidarum_NRRL_Y-27907	5983	555	208	347	5.79977	Ascomycota	619300	Unicellular / Yeast / Yeast-like	Sapr	1	1	0.288184	Proc Natl Acad Sci U S A. 2011 Aug 9;108(32):13212-7
Canar1_GeneCatalog_proteins_20111127	Candida_arabinofermentans_NRRL_YB-2248	5861	428	195	233	3.97543	Ascomycota	983967	Unicellular / Yeast / Yeast-like	Sapr	3	3	1.28755	Proc Natl Acad Sci U S A. 2016 Aug 30;113(35):9882-7
Pacta1_2_GeneCatalog_proteins_20110630	Pachysolen_tannophilus_NRRL_Y-2460	5675	395	187	208	3.6652	Ascomycota	669874	Unicellular / Yeast / Yeast-like	Sapr	1	2	0.480769	Proc Natl Acad Sci U S A. 2016 Aug 30;113(35):9882-7
Dekbr2_GeneCatalog_proteins_20120306	Brettanomyces_bruxellensis_CBS_2499	5636	388	197	191	3.38893	Ascomycota	747657	Unicellular / Yeast / Yeast-like	Sapr	1	1	0.52356	Int J Food Microbiol. 2012 Jul 2;157(2):202-9
Picme2_GeneCatalog_proteins_20111110	Pichia_membranifaciens	5546	456	186	270	4.86837	Ascomycota	4926	Unicellular / Yeast / Yeast-like	Sapr	2	2	0.740741	Proc Natl Acad Sci U S A. 2016 Aug 30;113(35):9882-7
Klula1_GeneCatalog_proteins_20130227	Kluyveromyces_lactis	5076	411	184	227	4.47203	Ascomycota	28985	Unicellular / Yeast / Yeast-like	Sapr	1	1	0.440529	Nature. 2004 Jul 1;430(6995):35-44
Zygro1_GeneCatalog_proteins_20150128	Zygosaccharomyces_rouxii_CBS_732	4991	386	179	207	4.14747	Ascomycota	559307	Unicellular / Yeast / Yeast-like	Sapr	3	4	1.44928	Genome Res. 2009 Oct;19(10):1696-709
Canca1_GeneCatalog_proteins_20110525	Tortispora_caseinolytica_NRRL_Y-17796	4657	385	170	215	4.61671	Ascomycota	767744	Unicellular / Yeast / Yeast-like	Sapr	1	1	0.465116	Proc Natl Acad Sci U S A. 2016 Aug 30;113(35):9882-7
Conlig1_GeneCatalog_proteins_20140604	Coniochaeta_ligniaria_NRRL_30616	13657	2312	650	1662	12.1696	Ascomycota	1408157	Filamentous	Sapr	8	8	0.481348	Genome Announc. 2017 Jan 26;5(4)
Ntetrasperma_mata	Neurospora_tetrasperma_FGSC_2509	11192	1543	459	1084	9.68549	Ascomycota	510952	Filamentous	Sapr	5	5	0.461255	Genetics. 2011 Sep;189(1):55-69
Chagl_1_GeneModels_BroadGeneModels_aa	Chaetomium_globosum	11124	1879	479	1400	12.5854	Ascomycota	38033	Filamentous	Sapr	8	8	0.571429	Nat Biotechnol. 2011 Oct 2;29(10):922-7
Neucr2_GeneCatalog_proteins_20130412	Neurospora_crassa_OR74A	10785	1582	493	1089	10.0974	Ascomycota	367110	Filamentous	Sapr	5	5	0.459137	Nature. 2003 Apr 24;422(6934):859-68
Podan2_GeneCatalog_proteins_20140114	Podospora_anserina_S_mat+	10588	1922	553	1369	12.9297	Ascomycota	515849	Filamentous	Sapr	2	2	0.146092	Genome Biol. 2008;9(5):R77
Thite2_GeneCatalog_proteins_20101221	Thielavia_terrestris	9813	1771	585	1186	12.086	Ascomycota	35720	Filamentous	Sapr	3	3	0.252951	Nat Biotechnol. 2011 Oct 2;29(10):922-7
TreeseiV2_FilteredModelsv2	Trichoderma_reesei	9129	1432	432	1000	10.9541	Ascomycota	51453	Filamentous	Sapr	5	5	0.5	Nat Biotechnol. 26, 553-560
Mycth_Spoth2_GeneCatalog_proteins_20101221	Thermothelomyces_thermophila	9110	1477	500	977	10.7245	Ascomycota	78579	Filamentous	Sapr	3	3	0.307062	Nat Biotechnol. 2011 Oct 2;29(10):922-7
Ophpic1_GeneCatalog_proteins_20151205	Ophiostoma_piceae_UAMH_11346	8884	1544	491	1053	11.8528	Ascomycota	1262450	Filamentous	Sapr	4	6	0.379867	BMC Genomics. 2013 Jun 2;14:373
Saico1_GeneCatalog_proteins_20110913	Saitoella_complicata_NRRL_Y-17804	7034	826	331	495	7.03725	Ascomycota	698492	Unicellular / Yeast / Yeast-like	Sapr	1	1	0.20202	Proc Natl Acad Sci U S A. 2016 Aug 30;113(35):9882-7
Schpo1_GeneCatalog_proteins_20130111	Schizosaccharomyces_pombe	5134	373	201	172	3.35021	Ascomycota	4896	Unicellular / Yeast / Yeast-like	Sapr	2	2	1.16279	Nature. 2002 Feb 21;415(6874):871-80
Schoc1_GeneCatalog_proteins_20131210	Schizosaccharomyces_octosporus_yFS286	4986	359	185	174	3.48977	Ascomycota	483514	Unicellular / Yeast / Yeast-like	Sapr	1	1	0.574713	Science. 2011 May 20;332(6032):930-6
Schja1_GeneCatalog_proteins_20131031	Schizosaccharomyces_japonicus_yFS275	4878	457	221	236	4.83805	Ascomycota	402676	Unicellular / Yeast / Yeast-like	Sapr	2	2	0.847458	Science. 2011 May 20;332(6032):930-6
Schcy1_GeneCatalog_proteins_20131210	Schizosaccharomyces_cryophilus_OY26	5180	383	178	205	3.95753	Ascomycota	653667	Unicellular / Yeast / Yeast-like	Sapr	#N/A	#N/A	#N/A	Science. 2011 May 20;332(6032):930-6
Pneji1_GeneCatalog_proteins_20130607	Pneumocystis_jirovecii	3520	178	72	106	3.01136	Ascomycota	42068	Unicellular / Yeast / Yeast-like	Sapr	#N/A	#N/A	#N/A	MBio. 2012 Dec 26;4(1):e00428-12
Psehu1_GeneCatalog_proteins_20130926	Pseudozyma_hubeiensis_SY62	7472	1060	311	749	10.0241	Basidiomycota	1305764	Unicellular / Yeast / Yeast-like	Sapr	5	5	0.667557	Genome Announc. 2013 Jun 27;1(4)
Psean1_1_GeneCatalog_proteins_20140109	Moesziomyces_antarcticus_T-34	6640	1328	399	929	13.991	Basidiomycota	1151754	Unicellular / Yeast / Yeast-like	Sapr	3	3	0.322928	Genome Announc. 2013 Apr 4;1(2):e0006413
Coere1_GeneCatalog_proteins_20110909	Coemansia_reversa_NRRL_1564	7347	910	373	537	7.30911	Zoopagomycota	763665	Filamentous	Sapr	5	5	0.931099	Genome Biol Evol. 2015 May 14;7(6):1590-601
Sclci1_GeneCatalog_proteins_20120626	Scleroderma_citrinum_Foug_A	21012	2073	633	1440	6.85323	Basidiomycota	1036808	Filamentous	Symb	#N/A	#N/A	#N/A	Nat Genet. 2015 Apr;47(4):410-5
Tulca1_GeneCatalog_proteins_20120608	Tulasnella_calospora_MUT_4182	19659	2187	691	1496	7.60975	Basidiomycota	1051891	Filamentous	Symb	#N/A	#N/A	#N/A	Nat Genet. 2015 Apr;47(4):410-5
Lacbi2_GeneCatalog_proteins_20110203	Laccaria_bicolor	23132	2726	867	1859	8.03649	Basidiomycota	29883	Filamentous	Symb	9	9	0.484131	Nature. 2008 Mar 6;452(7183):88-92
Pisti1_GeneCatalog_proteins_20120410	Pisolithus_tinctorius_Marx_270	22701	1585	745	840	3.70028	Basidiomycota	870435	Filamentous	Symb	6	6	0.714286	Nat Genet. 2015 Apr;47(4):410-5
Suibr2_GeneCatalog_proteins_20150912	Suillus_brevipes_Sb2	21458	2315	753	1562	7.27934	Basidiomycota	1400700	Filamentous	Symb	4	4	0.256082	Mol Ecol. 2015 Jun;24(11):2747-58
Pismi1_GeneCatalog_proteins_20120412	Pisolithus_microcarpus_441	21064	1380	639	741	3.51785	Basidiomycota	765257	Filamentous	Symb	1	1	0.134953	Nat Genet. 2015 Apr;47(4):410-5
Amamu1_GeneCatalog_proteins_20120806	Amanita_muscaria_Koide_BX008	18153	1993	694	1299	7.15584	Basidiomycota	946122	Filamentous	Symb	3	3	0.230947	Nat Genet. 2015 Apr;47(4):410-5
Paxin1_GeneCatalog_proteins_20110501	Paxillus_involutus_ATCC_200175	17968	1325	756	569	3.16674	Basidiomycota	664439	Filamentous	Symb	1	1	0.175747	Nat Genet. 2015 Apr;47(4):410-5
Lacam2_GeneCatalog_proteins_20150823	Laccaria_amethystina_LaAM-08-1	17553	1777	971	806	4.59181	Basidiomycota	1095629	Filamentous	Symb	7	7	0.868486	Nat Genet. 2015 Apr;47(4):410-5
Suilu3_GeneCatalog_proteins_20150730	Suillus_luteus_UH-Slu-Lm8-n1	16744	1921	661	1260	7.52508	Basidiomycota	930992	Filamentous	Symb	5	5	0.396825	Nat Genet. 2015 Apr;47(4):410-5
Hebcy2_GeneCatalog_proteins_20120913	Hebeloma_cylindrosporum_h7	15382	1838	695	1143	7.43076	Basidiomycota	686832	Filamentous	Symb	6	6	0.524934	New Phytol. 2015 Dec;208(4):1169-87
Sebve1_GeneCatalog_proteins_20120626	Serendipita_vermifera_MAFF_305830	15312	1912	672	1240	8.09822	Basidiomycota	933852	Filamentous	Symb	7	7	0.564516	Nat Genet. 2015 Apr;47(4):410-5
Plicr1_GeneCatalog_proteins_20111115	Piloderma_croceum_F_1598	13626	2104	635	1469	10.7809	Basidiomycota	765440	Filamentous	Symb	6	6	0.408441	Nat Genet. 2015 Apr;47(4):410-5
Cenge3_GeneCatalog_proteins_20130403	Cenococcum_geophilum_1.58	14748	1961	701	1260	8.54353	Ascomycota	794803	Filamentous	Symb	5	5	0.396825	Nat Commun. 2016 Sep 7;7:12662
EndpusZ1_GeneCatalog_proteins_20161028	Endocarpon_pusillum_Z07020	9238	1135	418	717	7.76142	Ascomycota	1263415	Filamentous	Symb	4	4	0.55788	BMC Genomics. 2014 Jan 17;15:34
Oidma1_GeneCatalog_proteins_20110606	Oidiodendron_maius_Zn	16703	2551	771	1780	10.6568	Ascomycota	913774	Filamentous	Symb	17	17	0.955056	Nat Genet. 2015 Apr;47(4):410-5
Rhiir2_1_GeneCatalog_proteins_20160502 / Rir_proteins	Rhizophagus_irregularis_DAOM_181602=DAOM_197198*	29911	1478	851	627	2.09622	Mucoromycota	747089	Filamentous	Symb	12	14	1.91388	PLoS Genet. 2014 Jan;10(1):e1004078	Proc Natl Acad Sci U S A. 2013 Dec 10;110(50):20117-22
Tubme1_GeneCatalog_proteins_20111120	Tuber_melanosporum_Mel28	7496	952	360	592	7.89755	Ascomycota	656061	Filamentous	Symb	1	1	0.168919	Nature. 2010 Apr 15;464(7291):1033-8
*: in the case of R. irregularis, numbers depicted in columns C-F and N refer to data published in PLoS Genet. 2014 Jan;10(1):e1004078. In columns L and M, the numbers depict the KEPs (L) and putative peptides (M) identified in Lin et al., 2014 (PLoS Genet. 2014 Jan;10(1):e1004078), in addition to a specific KEP (fgenesh1_pg.22___7, TableS2) that was only identified in Tisserant et al., 2013 (Pro…
** : Trichoderma virens and Trichoderma atroviride are two mycoparisitic fungi with KEPs that were excluded from the global analysis, because of the

## Sheet: b
TableS1b: species where KEX1, KEX2 or STE13 is absent
Phylum	Scientific Name	TaxID	Number of KEPs	Presence of KEX1	Presence of KEX2	Presence of STE13
Basidiomycota	Pseudozyma hubeiensis SY62	1305764	5	yes	no	yes
Basidiomycota	Malassezia sympodialis ATCC 42132	1230383	1	yes	yes	no
Basidiomycota	Trametes versicolor	5325	1	yes	no	yes
Basidiomycota	Coniophora puteana	80637	11	yes	no	yes
Ascomycota	Taphrina deformans	5011	1	yes	no	yes
Ascomycota	Pneumocystis jirovecii	42068	0	yes	no	yes
Microsporidia	Antonospora locustae HM-2013	1284279	1	no	no	no
Microsporidia	Encephalitozoon cuniculi GB-M1	284813	0	no	no	no
Microsporidia	Encephalitozoon hellem ATCC 50504	907965	0	no	no	no
Microsporidia	Encephalitozoon intestinalis ATCC 50506	876142	0	no	no	no
Microsporidia	Encephalitozoon romaleae SJ-2008	1178016	0	no	no	no
Microsporidia	Enterocytozoon bieneusi H348	481877	1	no	no	no
Microsporidia	Nematocida parisii ERTm1	881290	1	no	no	no
Microsporidia	Nosema ceranae BRL01	40302	1	no	no	no
Cryptomycota	Rozella allomycis CSF55	281847	0	no	yes	yes

## Sheet: c
Table S1c: Species with no KEPs
Phylum	Scientific Name	TaxID
Basidiomycota	Paxillus rubicundulus Ve08.2h10	930991
Basidiomycota	Fistulina hepatica	40457
Basidiomycota	Tulasnella calospora MUT 4182	1051891
Ascomycota	Penicillium digitatum PHI26	1170229
Ascomycota	Candida tenuis NRRL Y-1498	45596
Ascomycota	Nadsonia fulvescens var. elongata DSM 6958	857566
Ascomycota	Pichia stipitis	4924
Ascomycota	Pneumocystis jirovecii	42068
Microsporidia	Encephalitozoon cuniculi GB-M1	284813
Microsporidia	Encephalitozoon romaleae SJ-2008	1178016
Cryptomycota	Rozella allomycis CSF55	988480

## Sheet: d
Table S1d: Species with KEPs in which the total length of repeated motifs is less than 15% of the protein length
Phylum	Scientific Name	TaxID
Basidiomycota	Microbotryum lychnidis-dioicae p1A1 Lamole	683840
Basidiomycota	Trametes cinnabarina BRFM137	1445587
Basidiomycota	Scleroderma citrinum Foug A	1036808
Basidiomycota	Rhizoctonia solani AG-1 IB	1108050
Ascomycota	Komagataella pastoris	4922
Ascomycota	Hyphopichia burtonii NRRL Y-1933	984485
Ascomycota	Torulaspora delbrueckii CBS 1146	1076872
Ascomycota	Eremothecium gossypii ATCC 10895	284811
Ascomycota	Ogataea polymorpha NCYC 495 leu1.1	638633
Ascomycota	Schizosaccharomyces cryophilus OY26	653667
Mucoromycota	Mucor circinelloides CBS277.49	747725
Microsporidia	Encephalitozoon hellem ATCC 50504	907965
Microsporidia	Encephalitozoon intestinalis ATCC 50506	876142

## Sheet: e
Table S1e: Top producers of KEPs, relatively to their secretome size
Sequence file (JGI)	Scientific Name (NCBI)	Proteome size	SignalP3.0 or SignalP4.0 positives	TMHMM positives	SPs	%of SPs in the proteome	Phylum	TaxId	Morphology	Lifestyle	KEPs	KEP-derived peptides	%KEPS in SPs	Reference#1	Reference#2
Venpi1_GeneCatalog_proteins_20150407	Venturia_pyrina	11890	2102	550	1552	13.053	Ascomycota	415593	Filamentous	PatP	20	23	1.28866	J Proteome Res. 2014 Aug 1;13(8):3635-44
Melli1_GeneCatalog_proteins_20150227	Melampsora_lini	16335	1284	339	945	5.78512	Basidiomycota	5261	Filamentous	PatP	15	19	1.5873	Front Plant Sci. 2014 Mar 24;5:98
Orpsp1_1_GeneCatalog_proteins_20140826	Orpinomyces_sp.	18936	2097	663	1434	7.57288	Chytridiomycota	2002773	Filamentous	Endo	15	15	1.04603	Appl Environ Microbiol. 2013 Aug;79(15):4620-34
Rhyru1_1_GeneCatalog_proteins_20150204	Rhytidhysteron_rufulum	12117	1797	502	1295	10.6875	Ascomycota	37885	Filamentous	Sapr	13	13	1.00386	PLoS Pathog. 2012;8(12):e1003037
Rhiir2_1_GeneCatalog_proteins_20160502 / Rir_proteins	Rhizophagus_irregularis_DAOM_181602=DAOM_197198	29911	1478	851	627	2.09622	Mucoromycota	747089	Filamentous	Symb	12	14	1.91388	PLoS Genet. 2014 Jan;10(1):e1004078	Proc Natl Acad Sci U S A. 2013 Dec 10;110(50):20117-22
Fomme1_GeneCatalog_proteins_20101122	Fomitiporia_mediterranea	11333	1519	520	999	8.81497	Basidiomycota	208960	Filamentous	PatP	12	12	1.2012	Science. 2012 Jun 29;336(6089):1715-9
Mgraminicolav2	Zymoseptoria_tritici	10933	1620	503	1117	10.2168	Ascomycota	1047171	Filamentous	PatP	12	13	1.07431	PLoS Genet. 2011 Jun;7(6):e1002070
Sisni1_GeneCatalog_proteins_20130806	Sistotremastrum_niveocremeum_HHB9708	13080	1811	626	1185	9.05963	Basidiomycota	1314777	Filamentous	Sapr	12	13	1.01266	Mol Biol Evol. 2016 Apr;33(4):959-70
Batde5_best_proteins	Batrachochytrium_dendrobatidis_JAM81	8732	1342	401	941	10.7765	Chytridiomycota	684364	Unicellular / Yeast / Yeast-like	PatA	10	10	1.0627	https://genome.jgi.doe.gov/programs/fungi/index.jsf?core=genome&query=Batrachochytrium%20dendrobatidis&searchIn=Genome%20Portals&searchType=Keyword&showAll=false&externallySequenced=true&sortBy=displayNameStr&showRestricted=true&showOnlyPublished=false&showSuperseded=false&sortOrder=asc&rawQuery=false&showFungalOnly=true&activateHighlights=false&programName=all&programYear=all&superkingdom=--any-…
Walse1_GeneCatalog_proteins_20100910	Wallemia_sebi	5284	471	189	282	5.33687	Basidiomycota	148960	Filamentous	Sapr	6	7	2.12766	Fungal Genet Biol. 2012 Mar;49(3):217-26
Walic1_GeneCatalog_proteins_20131017	Wallemia_ichthyophaga_EXF-994	4863	455	173	282	5.79889	Basidiomycota	1299270	Filamentous	Sapr	6	9	2.12766	BMC Genomics. 2013 Sep 13;14:617
Treme1_best_proteins	Tremella_mesenterica_DSM_1558	8313	845	279	566	6.80861	Basidiomycota	578456	Filamentous	Sapr	6	6	1.06007	Science. 2012 Jun 29;336(6089):1715-9
Lodelo1_GeneCatalog_proteins_20161026	Lodderomyces_elongisporus_NRRL_YB-4239	5746	502	223	279	4.85555	Ascomycota	379508	Unicellular / Yeast / Yeast-like	PatA	5	5	1.79211	Nature. 2009 Jun 4;459(7247):657-62
Wican1_GeneCatalog_proteins_20110222	Wickerhamomyces_anomalus_NRRL_Y-366-8	6423	508	231	277	4.31263	Ascomycota	683960	Unicellular / Yeast / Yeast-like	Sapr	4	5	1.44404	Proc Natl Acad Sci U S A. 2016 Aug 30;113(35):9882-7
Canalb1_GeneCatalog_proteins_20161025	Candida_albicans_SC5314	6040	570	232	338	5.59603	Ascomycota	237561	Unicellular / Yeast / Yeast-like	PatA	4	4	1.18343	Genome Biol. 2007;8(4):R52
Zygro1_GeneCatalog_proteins_20150128	Zygosaccharomyces_rouxii_CBS_732	4991	386	179	207	4.14747	Ascomycota	559307	Unicellular / Yeast / Yeast-like	Sapr	3	4	1.44928	Genome Res. 2009 Oct;19(10):1696-709
Canar1_GeneCatalog_proteins_20111127	Candida_arabinofermentans_NRRL_YB-2248	5861	428	195	233	3.97543	Ascomycota	983967	Unicellular / Yeast / Yeast-like	Sapr	3	3	1.28755	Proc Natl Acad Sci U S A. 2016 Aug 30;113(35):9882-7
Kurca1_GeneCatalog_proteins_20160819	Kuraishia_capsulata_CBS_1993	6029	539	260	279	4.62763	Ascomycota	1382522	Unicellular / Yeast / Yeast-like	Sapr	3	3	1.07527	Genome Biol Evol. 2013;5(12):2524-39
Schpo1_GeneCatalog_proteins_20130111	Schizosaccharomyces_pombe	5134	373	201	172	3.35021	Ascomycota	4896	Unicellular / Yeast / Yeast-like	Sapr	2	2	1.16279	Nature. 2002 Feb 21;415(6874):871-80
Entbi1_GeneCatalog_proteins_20140106	Enterocytozoon_bieneusi_H348	3632	159	71	88	2.42291	Microsporidia	481877	Unicellular / Yeast / Yeast-like	PatA	1	1	1.13636	PLoS Pathog. 2009 Jan;5(1):e1000261
